# Supplementary material for: Saponins: Research Progress and Their Potential Role in the Post-COVID-19 Pandemic Era
Source: MDPI journal article supplement (doi:10.3390/pharmaceutics15020348), 2023-01-20
Supplement: s1 [file s1]

*Review*

# Saponins: Research progress and their potential role in the post-COVID-19 pandemic era

Daniel Mieres-Castro <sup>1</sup> and Freddy Mora-Poblete <sup>1,\*</sup>

<sup>1</sup> Institute of Biological Sciences, University of Talca, 1 Poniente 1141, Talca 3465548, Chile

\* Correspondence: morapoblete@gmail.com; Tel.: +56 71 2418878

**Supplementary Materials:**

**Table S1.** Summary of the main articles related to the anti-inflammatory effects of saponins studied in in vivo models of pulmonary inflammation.

| Saponin<br>[chemical structure]                              | Plant source                                                                         | Type of Study                                                                          | Activity          | Main Findings                                                                                                                                                                                                                                                                                                                                            | Doses     | Mechanism<br>of<br>Action                                                                                                              | Ref. |
|--------------------------------------------------------------|--------------------------------------------------------------------------------------|----------------------------------------------------------------------------------------|-------------------|----------------------------------------------------------------------------------------------------------------------------------------------------------------------------------------------------------------------------------------------------------------------------------------------------------------------------------------------------------|-----------|----------------------------------------------------------------------------------------------------------------------------------------|------|
| Saikosaponin A<br>[Triterpenoid saponin]                     | <i>Radix Bupleuri</i><br>( <i>Bupleurum chinense</i> and <i>B. scorzonrifolium</i> ) | In vivo (ALI induced by infection with influenza A in mice)                            | Anti-inflammatory | Significant inhibition of viral replication, abnormal production of proinflammatory cytokines (IFN- $\gamma$ , TNF- $\alpha$ , IL-1 $\beta$ , and IL-6), and pulmonary histopathology.<br><br>Significant inhibition of signaling of the NF- $\kappa$ B pathway.<br><br>Selective attenuation of the recruitment of pulmonary neutrophils and monocytes. | 25 mg/kg  | Inhibition of the NF- $\kappa$ B signaling pathway and selective attenuation of the recruitment of pulmonary neutrophils and monocytes | [53] |
| PNS<br>(Yunnan Phytopharmaceutical Co. Ltd., Kunming, China) | <i>Panax notoginseng</i>                                                             | In vivo (acute lung injury (ALI) induced by oleic acid and lipopolysaccharide in rats) | Anti-inflammatory | Significant reduction in lung parenchyma damage and extravascular lung water content.<br><br>Significant decrease in total leukocyte and neutrophil counts, proinflammatory cytokines (TNF- $\alpha$ and IL-6), and the $\alpha$ ENaC channel (protein and mRNA).                                                                                        | 100 mg/kg | Restoration of protein and mRNA expression of $\alpha$ ENaC and through anti-inflammatory effects                                      | [73] |

|                                                                            |                          |                                                  |                           |                                                                                                                                                                                                                                                                                                              |                                   |                                                                                                                                                                               |      |
|----------------------------------------------------------------------------|--------------------------|--------------------------------------------------|---------------------------|--------------------------------------------------------------------------------------------------------------------------------------------------------------------------------------------------------------------------------------------------------------------------------------------------------------|-----------------------------------|-------------------------------------------------------------------------------------------------------------------------------------------------------------------------------|------|
| PNS<br>(Kunming<br>Pharmaceutical<br>Group<br>Co., Ltd., Yunnan,<br>China) | <i>Panax notoginseng</i> | In vivo<br>(pulmonary<br>fibrosis in rabbits)    | Anti-<br>inflammator<br>y | Significant decrease in lung<br>injury and expression levels<br>of AST, LDH, CK, IL-6 and<br>IL-8.<br><br>Significantly decreased<br>activation of NF- $\kappa$ B<br>(decreased expression of NF-<br>$\kappa$ B-p65).                                                                                        | 50 mg/kg<br>daily, for 28<br>days | Inhibition of<br>the NF- $\kappa$ B<br>signaling<br>pathway                                                                                                                   | [74] |
| Ginsenoside Rg3<br>[Triterpenoid<br>saponin]                               | <i>Panax notoginseng</i> | In vivo (ALI<br>induced by<br>omethoate in rats) | Anti-<br>inflammator<br>y | Significant increase in<br>glutathione (GSH) content in<br>the lung.<br><br>Significant decrease in the<br>content of malondialdehyde<br>(MDA), TNF- $\alpha$ .<br><br>Significant decrease in the<br>activity of the enzymes<br>superoxide dismutase (SOD),<br>catalase (CAT) and<br>myeloperoxidase (MPO). | 5, 10, or 20<br>mg/kg             | Decreased<br>oxidative<br>stress by<br>increasing<br>reduced<br>glutathione<br>content and<br>decreasing<br>the activity of<br>SOD, CAT<br>and<br>myeloperoxy<br>dase enzymes | [75] |
| Ginsenoside Rg1<br>[Triterpenoid<br>saponin]                               | <i>Panax notoginseng</i> | In vivo (ALI<br>induced by sepsis<br>in mice)    | Anti-<br>inflammator<br>y | Significant decrease in lung<br>damage, and survival rate.<br><br>Significant suppression of the<br>secretion of inflammatory<br>cytokines (TNF- $\alpha$ and IL-6).<br><br>Significant increase in the<br>expression of sirtuin 1 (SIRT1)                                                                   | 10 or 20<br>mg/kg                 | Decreased<br>oxidative<br>stress by<br>increasing the<br>expression of<br>sirtuin 1<br>(SIRT1) in the<br>endoplasmic<br>reticulum                                             | [76] |

|                                           |                          |                                                           |                   |                                                                                                                                                                                                                                                                                                    |                     |                                                                                            |      |
|-------------------------------------------|--------------------------|-----------------------------------------------------------|-------------------|----------------------------------------------------------------------------------------------------------------------------------------------------------------------------------------------------------------------------------------------------------------------------------------------------|---------------------|--------------------------------------------------------------------------------------------|------|
| Ginsenoside Rb1<br>[Triterpenoid saponin] | <i>Panax notoginseng</i> | In vivo (ALI induced by Staphylococcus aureus in mice)    | Anti-inflammatory | Significant attenuation of lung injury.<br><br>Significant inhibition of the production of IL-1 $\beta$ , IL-6 and TNF- $\alpha$ .<br><br>Significant inhibition of TLR2 receptor activation and NF- $\kappa$ B and MAPK signaling (decreased phosphorylation of NF- $\kappa$ B-p65, ERK and JNK). | 10 or 20 mg/kg      | TLR2-mediated inhibition of the proinflammatory NF- $\kappa$ B and MAPK signaling pathways | [77] |
| Ginsenoside Rg1<br>[Triterpenoid saponin] | <i>Panax notoginseng</i> | In vivo (ALI induced by ischemia reperfusion in rats)     | Anti-inflammatory | Significant attenuation of histological abnormalities in the lung.<br><br>Significant decrease in the 6-keto-PGF1 $\alpha$ /TXB2 ratio, and MPO activity.<br><br>Significant inhibition of NF- $\kappa$ B activation and decreased COX-2 expression in lung tissue                                 | 40 mg/kg            | Inhibition of the NF- $\kappa$ B/COX-2 signaling pathway                                   | [78] |
| Ginsenoside Rg3<br>[Triterpenoid saponin] | <i>Panax notoginseng</i> | In vivo (ALI induced by lipopolysaccharide (LPS) in mice) | Anti-inflammatory | Significant reduction in pathological damage.<br><br>Significant decrease in MPO activity, proinflammatory cytokines (TNF- $\alpha$ ), IL-1 $\beta$ and IL-6)<br><br>Significant increase in anti-inflammatory mediators (IL-10                                                                    | 10, 20, or 30 mg/kg | Inhibition of the PI3K/Akt/mTOR pathway dependent on MerTK activation                      | [79] |

|                                           |                          |                                      |                   |                                                                                                                                                                                                                                                                                                                                                               |                     |                                                                                        |      |
|-------------------------------------------|--------------------------|--------------------------------------|-------------------|---------------------------------------------------------------------------------------------------------------------------------------------------------------------------------------------------------------------------------------------------------------------------------------------------------------------------------------------------------------|---------------------|----------------------------------------------------------------------------------------|------|
|                                           |                          |                                      |                   | and TGF- $\beta$ ), M2 macrophage polarization, and phosphorylated MerTK expression levels                                                                                                                                                                                                                                                                    |                     |                                                                                        |      |
|                                           |                          |                                      |                   | Significantly decreased PI3K, Akt, and mTOR phosphorylation                                                                                                                                                                                                                                                                                                   |                     |                                                                                        |      |
| Ginsenoside Rg5<br>[Triterpenoid saponin] | <i>Panax notoginseng</i> | In vivo (ALI induced by LPS in mice) | Anti-inflammatory | Significant inhibition of the expression of proinflammatory cytokines (IL-1 $\beta$ and TNF- $\alpha$ ), inflammatory enzymes (COX-2 and iNOS) and activation of the NF- $\kappa$ B pathway in bronchoalveolar lavage fluid (BALF) and in alveolar macrophages.<br><br>Significant inhibition of the interaction between LPS and TLR4 in alveolar macrophages | 2.5, 5 or 10 mg/kg  | Inhibition of the TLR4 signaling pathway in macrophages and lung tissue                | [80] |
| Ginsenoside Rh2<br>[Triterpenoid saponin] | <i>Panax notoginseng</i> | In vivo (ALI induced by LPS in mice) | Anti-inflammatory | Significant decrease in histological changes in lung tissues and BALF protein content.<br><br>Significant increase in the expression of HO-1, Nrf-2, CAT, SOD and GPx in lung tissue.<br><br>Significantly decreased production of NO, TNF- $\alpha$ , IL-1 $\beta$ , IL-4, IL-6 in lung tissues.                                                             | 5, 10, and 20 mg/kg | Regulation of TLR4/PI3K/Akt/mTOR, Raf-1/MEK/ERK and Keap1/Nrf2/HO-1 signaling pathways | [81] |

|                                          |                                                                                      |                                                  |                   |                                                                                                                                                                                                                                                                                                                                                    |                      |                                                                         |      |
|------------------------------------------|--------------------------------------------------------------------------------------|--------------------------------------------------|-------------------|----------------------------------------------------------------------------------------------------------------------------------------------------------------------------------------------------------------------------------------------------------------------------------------------------------------------------------------------------|----------------------|-------------------------------------------------------------------------|------|
|                                          |                                                                                      |                                                  |                   | Significant inhibition of the expression of iNOS, COX-2, and the phosphorylation of I $\kappa$ B $\alpha$ , ERK, JNK, p38, Raf-1 and MEK.                                                                                                                                                                                                          |                      |                                                                         |      |
| Ginsenoside Ro<br>[Triterpenoid saponin] | <i>Panax notoginseng</i>                                                             | In vivo (ALI induced by LPS in mice)             | Anti-inflammatory | Significant reduction in lung injury.<br><br>Significant inhibition of the expression and secretion levels of proinflammatory cytokines (TNF- $\alpha$ , IL-1 $\beta$ and IL-6).<br><br>Significant inhibition of activation of the NF- $\kappa$ B and MAPK pathways<br><br>Ginsenoside Ro coupled to the LPS binding site of the TLR4/MD2 complex | 20, 40, and 80 mg/kg | Inhibition of the TLR4 signaling pathway in macrophages and lung tissue | [82] |
| Saikosaponin D<br>[Triterpenoid saponin] | <i>Radix Bupleuri</i><br>( <i>Bupleurum chinense</i> and <i>B. scorzonrifolium</i> ) | In vivo (ventilator-induced lung injury in rats) | Anti-inflammatory | Significantly decreased expression of proinflammatory cytokines (MIP-2, IL-6 and TNF- $\alpha$ ) and oxidative enzymes (MPO)<br><br>Significant increase in the expression of anti-inflammatory mediators (TGF- $\beta$ 1 and IL-10).<br><br>Significant decrease in apoptosis (Caspase-3 and Bax) and                                             | 80 mg/kg             | Inhibition of oxidative stress and apoptosis in lung tissue             | [83] |

|                                          |                                                                                        |                                      |                   |                                                                                                                                                                                                                                                                |                                    |                                                              |      |
|------------------------------------------|----------------------------------------------------------------------------------------|--------------------------------------|-------------------|----------------------------------------------------------------------------------------------------------------------------------------------------------------------------------------------------------------------------------------------------------------|------------------------------------|--------------------------------------------------------------|------|
|                                          |                                                                                        |                                      |                   | increase in anti-apoptotic proteins (bcl-2)                                                                                                                                                                                                                    |                                    |                                                              |      |
| Saikosaponin A<br>[Triterpenoid saponin] | <i>Radix Bupleuri</i><br>( <i>Bupleurum chinense</i> and <i>B. scorzonnerifolium</i> ) | In vivo (ALI induced by LPS in mice) | Anti-inflammatory | Significant reduction in lung injury.<br><br>Significant inhibition of MPO activity and inflammatory cytokines (TNF- $\alpha$ and IL-1 $\beta$ ) in BALF<br><br>Significant inhibition of NF- $\kappa$ B pathway activation and NLRP3 inflammasome expression. | 5, 10, or 20 mg/kg                 | Inhibition of the NF- $\kappa$ B and NLRP3 signaling pathway | [84] |
| Glycyrrhizin<br>[Triterpenoid saponin]   | <i>Glycyrrhiza</i> spp.                                                                | In vivo (ALI induced by LPS in mice) | Anti-inflammatory | Significant decrease in the expression of TLR2, inflammatory cells, collagen, MIP-2, KC, IL-4, IL-6, GM-CSF and IFN- $\gamma$ .<br><br>Significant inhibition of the TLR signaling pathway and the NF- $\kappa$ B signaling pathway.                           | 0.5mg/mL<br>(In respiratory tract) | Inhibition of the TLR2 signaling pathway                     | [85] |
| Glycyrrhizin<br>[Triterpenoid saponin]   | <i>Glycyrrhiza</i> spp.                                                                | In vivo (ALI induced by LPS in mice) | Anti-inflammatory | Significant decrease in histopathological changes in the lung.<br><br>Significant decrease in TLR4 and CXCR4 in lung tissue<br><br>Significant decrease in inflammatory cell count, pro-inflammatory cytokines                                                 | 50 mg/kg, twice daily              | Inhibition of the TLR4/NF- $\kappa$ B signal pathway         | [86] |

|                                        |                         |                                            |                   |                                                                                                                                                                                                                                                                                                                            |                                             |                                                                                         |      |
|----------------------------------------|-------------------------|--------------------------------------------|-------------------|----------------------------------------------------------------------------------------------------------------------------------------------------------------------------------------------------------------------------------------------------------------------------------------------------------------------------|---------------------------------------------|-----------------------------------------------------------------------------------------|------|
|                                        |                         |                                            |                   | (TNF- $\alpha$ , IL-1 $\beta$ , and IL-6), MPO activity, and expressions of COX-2, iNOS, and NF-Kb in BALF.                                                                                                                                                                                                                |                                             |                                                                                         |      |
| Glycyrrhizin<br>[Triterpenoid saponin] | <i>Glycyrrhiza</i> spp. | In vivo (ALI induced by radiation in mice) | Anti-inflammatory | Significant decrease in plasma concentrations of HMGB1, sRAGE, and expression levels of proinflammatory cytokines (TNF- $\alpha$ , IL-1 $\beta$ and IL-6) in BALF.<br><br>Significant inhibition of downstream transcription factors related to the HMGB/TLR4 pathway (NF- $\kappa$ B, JNK and ERK1/2) in lung tissue.     | 10 mg/kg three times per week until week 12 | Inhibition of the HMGB1/TLR4 signal pathway                                             | [87] |
| Glycyrrhizin<br>[Triterpenoid saponin] | <i>Glycyrrhiza</i> spp. | In vivo (ALI induced by LPS in mice)       | Anti-inflammatory | Significant decrease in lung injury<br><br>Significantly decreased production of inflammatory factors TNF- $\alpha$ , IL-1 $\beta$ and HMGB1.<br><br>Significant increase in autophagy (increased number of autophagosomes) through upregulation of LC3-II/I and Beclin-1 protein levels and downregulation of SQSTM1/P62. | 200 mg/kg                                   | Regulation of autophagy related to the negative regulation of the PI3K/Akt/mTOR pathway | [88] |



|                                            |                                |                                           |                   |                                                                                                                                                                                                                                                                                         |                                        |                                                          |      |
|--------------------------------------------|--------------------------------|-------------------------------------------|-------------------|-----------------------------------------------------------------------------------------------------------------------------------------------------------------------------------------------------------------------------------------------------------------------------------------|----------------------------------------|----------------------------------------------------------|------|
|                                            |                                |                                           |                   | Glycyrrhizin-induced autophagy was associated with negative regulation (decreased phosphorylation levels) of the PI3K/Akt/mTOR pathway.                                                                                                                                                 |                                        |                                                          |      |
| Esculentoside A<br>[Triterpenoid saponin]  | <i>Phytolacca esculenta</i>    | In vivo (ALI induced by LPS in mice)      | Anti-inflammatory | Significant decrease in inflammatory infiltration, alveolar wall thickening, and pulmonary congestion<br><br>Significant decrease in proinflammatory cytokines (TNF- $\alpha$ and IL-6) in BALF.<br><br>Significantly decreased phosphorylation of I $\kappa$ B $\alpha$ , p38 and ERK. | 15, 30, and 60 mg/kg                   | Inhibition of NF- $\kappa$ B and MAPK signaling pathways | [89] |
| Anemoside B4<br>[Triterpenoid saponin]     | <i>Pulsatilla chinensis</i>    | In vivo (ALI induced by LPS in mice)      | Anti-inflammatory | Significant decrease in lung damage.<br><br>Significant decrease in the CD4+/CD8+ T lymphocyte ratio<br><br>Significantly decreased phosphorylation of NF- $\kappa$ B-p65 and I $\kappa$ B $\alpha$                                                                                     | 12.5, 25, 50 mg/kg                     | Inhibition of NF- $\kappa$ B signaling pathways          | [90] |
| Astragaloside IV<br>[Triterpenoid saponin] | <i>Astragalus membranaceus</i> | In vivo (ALI induced by paraquat in mice) | Anti-inflammatory | Significant decrease in histopathological changes in the lung.<br><br>Significant decrease in the levels of MDA, MPO and                                                                                                                                                                | 50 mg/kg or 100 mg/kg daily for 5 days | Trx/Txnip regulation and inhibition of Rho/ROCK/         | [91] |

|                                        |                          |                                      |                   |                                                                                                                                                                                                                                                                                                                                                   |                   |                                                                                         |      |
|----------------------------------------|--------------------------|--------------------------------------|-------------------|---------------------------------------------------------------------------------------------------------------------------------------------------------------------------------------------------------------------------------------------------------------------------------------------------------------------------------------------------|-------------------|-----------------------------------------------------------------------------------------|------|
|                                        |                          |                                      |                   | proinflammatory cytokines (TNF- $\alpha$ , IL-1 $\beta$ and IL-6).<br><br>Significant increase in SOD, CAT and GSH-Px levels.<br><br>Significantly decreased expression of Txnip/Trx and the Rho/ROCK/NF- $\kappa$ B signaling pathway.                                                                                                           |                   | NF- $\kappa$ B signals                                                                  |      |
| Asiaticoside<br>[Triterpenoid saponin] | <i>Centella asiatica</i> | In vivo (septic lung injury in mice) | Anti-inflammatory | Significant decrease in histopathological changes in the lung.<br><br>Significant inhibition of COX-2 and iNOS expression, and increased expression of PPAR- $\gamma$ in lung tissues.<br><br>Significant decrease in TNF- $\alpha$ and IL-6 levels.<br><br>Significant inhibition of ERK1/2, JNK, P38 and I $\kappa$ B $\alpha$ phosphorylation. | 45 mg/kg          | Inhibition of the NF- $\kappa$ B and MAPK signaling pathways mediated by PPAR- $\gamma$ | [92] |
| Asiaticoside<br>[Triterpenoid saponin] | <i>Centella asiatica</i> | In vivo (ALI induced by LPS in mice) | Anti-inflammatory | Significant decrease in inflammatory infiltration and histopathological changes in the lung.<br><br>Significantly decreased MPO activity and TNF- $\alpha$ and IL-6 levels in BALF.                                                                                                                                                               | 15, 30 or 45mg/kg | Inhibition of NF- $\kappa$ B signaling pathways                                         | [93] |

|                                                 |                                                     |                                      |                   |                                                                                                                                                                                                                                                                                                                                                              |                    |                                                                                 |      |
|-------------------------------------------------|-----------------------------------------------------|--------------------------------------|-------------------|--------------------------------------------------------------------------------------------------------------------------------------------------------------------------------------------------------------------------------------------------------------------------------------------------------------------------------------------------------------|--------------------|---------------------------------------------------------------------------------|------|
|                                                 |                                                     |                                      |                   | Significant increase in I $\kappa$ B $\alpha$ expression and decrease in NF- $\kappa$ B-p65 phosphorylation.                                                                                                                                                                                                                                                 |                    |                                                                                 |      |
| Tenuigenin<br>[Triterpenoid saponin]            | <i>Polygala tenuifolia</i>                          | In vivo (ALI induced by LPS in mice) | Anti-inflammatory | Significant decrease in histopathological changes in the lung.<br><br>Significant inhibition of<br><br>Significant decrease in MPO activity in lung tissue.<br><br>Significantly decreased COX-2 expression and TNF- $\alpha$ , IL-1 $\beta$ and IL-6 levels in BALF.<br><br>Significantly decreased phosphorylation of I $\kappa$ B $\alpha$ , p38 and ERK. | 2, 4 or 8 mg/kg    | Inhibition of NF- $\kappa$ B and MAPK signaling pathways                        | [94] |
| Pseudoginsenoside-F11<br>[Triterpenoid saponin] | <i>Panax pseudoginseng</i> subsp. <i>Himalaicus</i> | In vivo (ALI induced by LPS in mice) | Anti-inflammatory | Significant decrease in histopathological changes in the lung.<br><br>Significantly decreased expression of<br><br>TNF- $\alpha$ , IL-1 $\beta$ and IL-6 in lung tissue and BALF.<br><br>Significantly decreased expression of<br><br>MIP-2 and ICAM-1 and neutrophil infiltration                                                                           | 3, 10, or 30 mg/kg | Suppression of neutrophil infiltration and acceleration of neutrophil clearance | [95] |

|                                        |                                |                                      |                   |                                                                                                                                                                                                                                                                                                                                                                                                                                                                      |                       |                                                                  |      |
|----------------------------------------|--------------------------------|--------------------------------------|-------------------|----------------------------------------------------------------------------------------------------------------------------------------------------------------------------------------------------------------------------------------------------------------------------------------------------------------------------------------------------------------------------------------------------------------------------------------------------------------------|-----------------------|------------------------------------------------------------------|------|
|                                        |                                |                                      |                   | Significant increase in neutrophil clearance in BALF.                                                                                                                                                                                                                                                                                                                                                                                                                |                       |                                                                  |      |
| Platycodin D<br>[Triterpenoid saponin] | <i>Platycodon grandiflorum</i> | In vivo (ALI induced by LPS in mice) | Anti-inflammatory | Significantly decreased pathological changes and the wet to dry weight (W/D) ratio of the lungs.<br><br>Significant decrease in total leukocyte number and percentage of neutrophils in BALF and MPO activity in lung tissue.<br><br>Significantly decreased TNF- $\alpha$ and IL-6 levels and increased SOD activity in BALF.<br><br>Significantly decreased expression of NF- $\kappa$ B-p65, Caspase-3 and Bax, and increased expression of Bcl-2 in lung tissue. | 50 mg/kg or 100 mg/kg | Suppression of apoptosis by downregulation of Caspase-3 and Bax  | [96] |
| Platycodin D<br>[Triterpenoid saponin] | <i>Platycodon grandiflorum</i> | In vivo (ALI induced by LPS in mice) | Anti-inflammatory | Significant decrease in histopathological changes and MPO activity in the lungs.<br><br>Significantly decreased macrophage and neutrophil, and TNF- $\alpha$ , IL-1 $\beta$ , and IL-6 levels in BALF.                                                                                                                                                                                                                                                               | 20, 40, or 80 mg/kg   | Positive regulation of the LXR $\alpha$ -ABCA1 signaling pathway | [97] |

|                                 |                               |                                            |                   |                                                                                                                                                                                                                                                                                                                              |                            |                                                                |      |
|---------------------------------|-------------------------------|--------------------------------------------|-------------------|------------------------------------------------------------------------------------------------------------------------------------------------------------------------------------------------------------------------------------------------------------------------------------------------------------------------------|----------------------------|----------------------------------------------------------------|------|
|                                 |                               |                                            |                   | Significantly decreased phosphorylation of NF- $\kappa$ B-p65 and IRF3.                                                                                                                                                                                                                                                      |                            |                                                                |      |
|                                 |                               |                                            |                   | Significant decrease in lipid raft formation (GM-1 expression) and TLR4 recruitment.                                                                                                                                                                                                                                         |                            |                                                                |      |
|                                 |                               |                                            |                   | Significant decrease in cholesterol levels in membrane lipid rafts                                                                                                                                                                                                                                                           |                            |                                                                |      |
|                                 |                               |                                            |                   | Significant increase in ABCA1 transcriptional activity and LXR $\alpha$ expression.                                                                                                                                                                                                                                          |                            |                                                                |      |
| Escin<br>[Triterpenoid saponin] | <i>Aesculus hippocastanum</i> | In vivo (ALI induced by endotoxin in mice) | Anti-inflammatory | Significant decrease in histopathological changes in the lung.<br><br>Significant decrease in MPO activity and serum MDA, NO, TNF- $\alpha$ , IL-1 $\beta$ and IL-6 levels.<br><br>Significant increase in SOD and GPx activity in serum.<br><br>Significant increase in protein expression of glucocorticoid receptors (GR) | 0.9, 1.8 or 3.6 mg/kg      | Increased expression of GR and endogenous antioxidant capacity | [98] |
| Escin<br>[Triterpenoid saponin] | <i>Aesculus hippocastanum</i> | In vivo (ALI induced by LPS in rats)       | Anti-inflammatory | Significant decrease in histopathological changes in the lung.<br><br>Significantly decreased levels of proinflammatory cytokines                                                                                                                                                                                            | Monotherapy: Escin 5 mg/kg | Negative regulation of the signaling cascades HMGB1,           | [99] |

|                                |                       |                                                                     |                   |                                                                                                                                                                                                                                                                                                                                                                                                                               |                                                                               |                                                           |       |
|--------------------------------|-----------------------|---------------------------------------------------------------------|-------------------|-------------------------------------------------------------------------------------------------------------------------------------------------------------------------------------------------------------------------------------------------------------------------------------------------------------------------------------------------------------------------------------------------------------------------------|-------------------------------------------------------------------------------|-----------------------------------------------------------|-------|
|                                |                       |                                                                     |                   | <p>(TNF-<math>\alpha</math>, IL-1<math>\beta</math>, and IL-6) in serum, BALF, and lung tissue.</p> <p>Significant decrease in inflammasomes (NLRP3 expression) and pyroptosis.</p> <p>Significantly decreased expression of HMGB1, TLR4, MyD88, MAPK, and NF-<math>\kappa</math>B-p65.</p> <p>Combined treatment (Escin + Q10) showed better results in all trials (synergistic effect).</p>                                 | <p>Combined treatment: Escin (5 mg/kg) + coenzyme Q10 (CoQ10) (100 mg/kg)</p> | <p>TLR4, MyD88, MAPK and NF-<math>\kappa</math>B-p65.</p> |       |
| Dioscin<br>[Steroidal saponin] | <i>Dioscorea</i> spp. | In vivo (pulmonary fibrosis induced by crystal-line silica in mice) | Anti-inflammatory | <p>Significant decrease in histopathological changes and the infiltration of macrophages, B lymphocytes, T lymphocytes and fibrocytes in the lung.</p> <p>Significantly decreased levels of TNF-<math>\alpha</math>, TGF-<math>\beta</math>, IFN-<math>\gamma</math>, IL-1<math>\beta</math>, IL-2, IL-4, IL-6, IL-13, IL-17A in BALF and lung tissue.</p> <p>Significantly decreased ASK-1, p38 and JNK phosphorylation.</p> | 20, 40 or 80 mg/kg                                                            | Inhibition of the ASK-1-p38/JNK signaling pathway         | [100] |
| Dioscin<br>[Steroidal saponin] | <i>Dioscorea</i> spp. | In vivo (ALI induced by bleomycin in mice)                          | Anti-inflammatory | <p>Significant decrease in histopathological changes, MPO activity and MDA contents in lung tissue.</p>                                                                                                                                                                                                                                                                                                                       | 80 mg/kg                                                                      | Inhibition of the NF- $\kappa$ B signaling pathway        | [101] |

|                                |                       |                                               |                   |                                                                                                                                                                                                                                                                                                                                                                                                                                                                                    |                                                                           |                                                |       |
|--------------------------------|-----------------------|-----------------------------------------------|-------------------|------------------------------------------------------------------------------------------------------------------------------------------------------------------------------------------------------------------------------------------------------------------------------------------------------------------------------------------------------------------------------------------------------------------------------------------------------------------------------------|---------------------------------------------------------------------------|------------------------------------------------|-------|
|                                |                       |                                               |                   | <p>Significant decrease in the total number of cells, macrophages, neutrophils, and total protein in BALF.</p> <p>Significantly decreased expression (mRNA and protein) of TNF-<math>\alpha</math>, IL-1<math>\beta</math> and IL-6 in lung tissue.</p> <p>Significantly decreased protein expression of HGMB1, COX-2, and NF-<math>\kappa</math>B-p65 in lung tissue.</p>                                                                                                         |                                                                           |                                                |       |
| Dioscin<br>[Steroidal saponin] | <i>Dioscorea</i> spp. | In vivo (ALI induced by LPS in mice and rats) | Anti-inflammatory | <p>Significant decrease in histopathological changes in the lung.</p> <p>Significant inhibition of inflammatory cell infiltration and MDA, SOD, NO and iNOS levels.</p> <p>Significantly decreased levels of TNF-<math>\alpha</math>, IL-1<math>\beta</math>, and IL-6 mRNA.</p> <p>Significant decrease in protein levels of TLR4, MyD88, TRAF6, TKB1, TRAF3, and phosphorylation levels of PI3K, Akt, I<math>\kappa</math>B<math>\alpha</math>, NF-<math>\kappa</math>B-p65.</p> | <p>20, 40, and 80 mg/kg for mice</p> <p>15, 30, and 60 mg/kg for rats</p> | Inhibition of the TLR4/MyD88 signaling pathway | [102] |

|                                |                       |                                      |                   |                                                                                                                                                                                                                                                                                                                                                                                                                                                            |                      |                                                |       |
|--------------------------------|-----------------------|--------------------------------------|-------------------|------------------------------------------------------------------------------------------------------------------------------------------------------------------------------------------------------------------------------------------------------------------------------------------------------------------------------------------------------------------------------------------------------------------------------------------------------------|----------------------|------------------------------------------------|-------|
| Dioscin<br>[Steroidal saponin] | <i>Dioscorea</i> spp. | In vivo (ALI induced by LPS in mice) | Anti-inflammatory | <p>Significant decrease in lesion and water content in the lung.</p> <p>Significantly decreased total number of alveolar macrophages and total protein in BALF.</p> <p>Significantly decreased levels of TNF-<math>\alpha</math>, IL-1<math>\beta</math>, IL-6, MPO, IFN-<math>\gamma</math>, ICAM-1, and NF-<math>\kappa</math>B-p65.</p> <p>Significant decrease in protein expression of TLR4, MyD88, NF-<math>\kappa</math>B-p65, COX-2 and HSP70.</p> | 20, 40, and 60 mg/kg | Inhibition of the TLR4/MyD88 signaling pathway | [103] |
| Dioscin<br>[Steroidal saponin] | <i>Dioscorea</i> spp. | In vivo (ALI induced by LPS in mice) | Anti-inflammatory | <p>Significant decrease in histopathological changes, permeability, edema and MPO activity in the lungs.</p> <p>Significantly decreased total cell and neutrophil numbers, total protein, TNF-<math>\alpha</math>, IL-6, and keratinocyte chemoattractant (KC) in BALF.</p> <p>Significantly decreased protein expression of COX-2, TLR4, and phosphorylated NF-<math>\kappa</math>B-p65.</p>                                                              | 20, 40, or 80 mg/kg  | Inhibition of the TLR4/MyD88 signaling pathway | [104] |



|                                |                            |                                                                     |                   |                                                                                                                                                                                                                                                                                                                                                              |                    |                                                                                                             |       |
|--------------------------------|----------------------------|---------------------------------------------------------------------|-------------------|--------------------------------------------------------------------------------------------------------------------------------------------------------------------------------------------------------------------------------------------------------------------------------------------------------------------------------------------------------------|--------------------|-------------------------------------------------------------------------------------------------------------|-------|
| Dioscin<br>[Steroidal saponin] | <i>Dioscorea</i> spp.      | In vivo (Asthma induced by ovalbumin in mice)                       | Anti-inflammatory | Significant decrease in the infiltration of inflammatory cells in lung tissue.<br><br>Significantly decreased levels of TNF- $\alpha$ , IL-1 $\beta$ and IL-6 in BALF.<br><br>Significant increase in the expression (mRNA and protein) of $\alpha$ -glucocorticoid receptors (SLPI, GILZ and MKP-1) and inhibition of HSP70.                                | 100 mg/kg          | Increased expression of $\alpha$ -glucocorticoid receptors and inhibition of HSP70                          | [105] |
| Dioscin<br>[Steroidal saponin] | <i>Dioscorea</i> spp.      | In vivo (pulmonary fibrosis induced by crystal-line silica in mice) | Anti-inflammatory | Significant decrease in inflammatory cell infiltration and fibrosis in lung tissue.<br><br>Significant decrease in apoptotic cells (annexin A5 expression) and increase in autophagosomes by cells and lung tissue.<br><br>Significant increase in LC3-II/I expression.<br><br>Significantly decreased expression of p62 and phosphorylation of Akt and mTOR | 20, 40 or 80 mg/kg | Increased autophagy of alveolar macrophages associated with the negative regulation of the Akt/mTOR pathway | [106] |
| Trillin<br>[Steroidal saponin] | <i>Dioscorea nipponica</i> | In vivo (ALI induced by LPS in mice)                                | Anti-inflammatory | Significant decrease in pathological changes, MPO activity and W/D ratio in lung tissue.                                                                                                                                                                                                                                                                     | 50 or 100 mg/kg    | Activation of the Nrf2/HO-1 signaling pathway and inhibition of                                             | [107] |

|                                          |                                  |                                      |                   |                                                                                                                                                                                                                                                                                                                  |                |                                                          |       |
|------------------------------------------|----------------------------------|--------------------------------------|-------------------|------------------------------------------------------------------------------------------------------------------------------------------------------------------------------------------------------------------------------------------------------------------------------------------------------------------|----------------|----------------------------------------------------------|-------|
|                                          |                                  |                                      |                   | Significant decrease in the levels of IL-1 $\beta$ and IL-6 and increase in the levels of SOD, MDA, CAT, GSH, GSH-px in BALF.                                                                                                                                                                                    |                | the NF- $\kappa$ B pathway                               |       |
|                                          |                                  |                                      |                   | Significant increase in protein expression of Nrf-2 and HO-1 and decreased phosphorylation of NF- $\kappa$ B-p65 and I $\kappa$ B $\alpha$                                                                                                                                                                       |                |                                                          |       |
| Timosaponin A-III<br>[Steroidal saponin] | <i>Anemarrhena asphodeloides</i> | In vivo (ALI induced by LPS in mice) | Anti-inflammatory | Significant decrease in histopathological changes and levels of IL-1 $\beta$ and IL-6 in lung tissue.<br><br>Significant decrease in the total number of cells, macrophages and neutrophils in BALF.<br><br>Significantly decreased NF- $\kappa$ B-p65, p38, JNK, ERK, and STAT3 phosphorylation in lung tissue. | 25 or 50 mg/kg | Inhibition of NF- $\kappa$ B and MAPK signaling pathways | [108] |

**Table S2.** Summary of the main studies related to the antiplatelet-antithrombotic effects of saponins in clinical trials and in vivo models of pulmonary coagulopathies.

| Saponin<br>[chemical structure]                                     | Plant source                                                                                                    | Type of Study                                                                                                                                             | Activity        | Main Findings                                                                                                                                                                                                                         | Doses                                                                                                             | Mechanism<br>of<br>Action          | Ref.  |
|---------------------------------------------------------------------|-----------------------------------------------------------------------------------------------------------------|-----------------------------------------------------------------------------------------------------------------------------------------------------------|-----------------|---------------------------------------------------------------------------------------------------------------------------------------------------------------------------------------------------------------------------------------|-------------------------------------------------------------------------------------------------------------------|------------------------------------|-------|
| extracts of total steroidal saponins (TSS)                          | <i>Dioscorea zingiberensis</i>                                                                                  | Ex vivo (platelet aggregation in rat model)                                                                                                               | Anti-thrombotic | TSS-DZW significantly inhibited (up to 25% inhibition) ADP-induced platelet aggregation and reduced thrombus size induced by inferior vena cava ligation in rats by up to 84%.                                                        | Oral administration for 2 weeks of TSS:<br>Rats: 32.3, 64.7, and 129.4 mg/kg<br>Mice: 45.3, 90.6, and 181.1 mg/kg | Inhibition of platelet aggregation | [109] |
| protodeltonin, deltonin, parvifloside, y zingiberensis saponin      |                                                                                                                 | In vivo (bleeding time, coagulation factors, and protection rate in inferior vena cava ligation thrombosis rat model and pulmonary thrombosis mice model) |                 | TSS-DZW prolonged the time of coagulation parameters (APTT, TT, and PT) and bleeding time in a dose-dependent manner in mice.<br><br>TSS-DZW provided significant (45.4%) protection against death from pulmonary thrombosis in mice. |                                                                                                                   |                                    |       |
| [Steroidal saponins]                                                |                                                                                                                 |                                                                                                                                                           |                 |                                                                                                                                                                                                                                       |                                                                                                                   |                                    |       |
| Naodesheng (NDS) formula                                            | <i>Rhizoma Chuanxiong, Lobed Kudzu vine, Carthamus tinctorius, Radix Notoginseng and Cra-taegus pinnatifida</i> | Ex vivo (platelet aggregation rat model)                                                                                                                  | Anti-thrombotic | The NDS bioactive fraction CD significantly inhibited (22.48% inhibition) ADP-induced platelet aggregation in rats.                                                                                                                   | Daily oral administration of 2.14 g/kg for 5 days (rats and mice)                                                 | Inhibition of platelet aggregation | [110] |
| Notoginsenoside R1 y Ginsenoside (Re, Rg1, Rb1, Rb2, Rb3, Rc, y Rd) |                                                                                                                 | In vivo (Blood clotting time and protection rate in                                                                                                       |                 | CD-NDS prolonged clotting time to and provided significant (60%) protection against                                                                                                                                                   |                                                                                                                   |                                    |       |

|                                                                                         |                                |                                                                                                                                                         |                                   |                                                                                                                                                                                                                                                                                                                            |                                                                                                                                                                               |                                                                                                                          |       |
|-----------------------------------------------------------------------------------------|--------------------------------|---------------------------------------------------------------------------------------------------------------------------------------------------------|-----------------------------------|----------------------------------------------------------------------------------------------------------------------------------------------------------------------------------------------------------------------------------------------------------------------------------------------------------------------------|-------------------------------------------------------------------------------------------------------------------------------------------------------------------------------|--------------------------------------------------------------------------------------------------------------------------|-------|
| [Triterpenoid saponins]                                                                 |                                | pulmonary thrombosis mice model)                                                                                                                        |                                   | death from pulmonary thrombosis in mice.                                                                                                                                                                                                                                                                                   |                                                                                                                                                                               |                                                                                                                          |       |
| Diosgenyl β-D-galactopyranosyl-(1→4)-β-D-glucopyranoside (C3)<br>(diosgenin derivative) | <i>Dioscorea zingiberensis</i> | Ex vivo (platelet aggregation in rat model)<br><br>In vivo (bleeding time, coagulation factors, and protection rate in pulmonary thrombosis mice model) | Anti-thrombotic                   | Compound C3 at a dose of 100 mg/kg significantly inhibited (15% inhibition) ADP- and thrombin-induced platelet aggregation in rats.<br><br>C3 increased APTT (20.95 sec), inhibited factor VIII activities (35% inhibition), and provided significant protection (45.45%) against death from pulmonary thrombosis in mice. | Oral administration of 25-100 μM, twice a day for five days (rats and mice)<br><br>In protection rate in pulmonary thrombosis mice model: oral administration of 25-100 mg/kg | Inhibition of platelet aggregation and factor VIII activities                                                            | [111] |
| [Steroidal saponin]                                                                     |                                |                                                                                                                                                         |                                   |                                                                                                                                                                                                                                                                                                                            |                                                                                                                                                                               |                                                                                                                          |       |
| <i>Panax notoginseng</i> saponins (PNS)                                                 | <i>Panax notoginseng</i>       | In vitro (platelet activation and aggregation assays)                                                                                                   | Anti-platelet/<br>Anti-thrombotic | In in vitro assays, treatment with PNS (100 μg/mL) significantly inhibited thrombin-induced platelet aggregation (up to 20%) and was associated with PPAR-γ overexpression, its positive regulation of the PI3K)/Akt/ eNOS.                                                                                                | In vitro assays: 1, 10, 100 μg/mL                                                                                                                                             | Inhibition of platelet activation and aggregation by upregulating the PI3K/Akt/eNOS pathway in a PPAR-γ-dependent manner | [112] |
| ginsenoside Rg1, ginsenoside Rb1<br>[Triterpenoid saponins]                             |                                | In vivo (improvement of the hypercoagulable state in rat hypercoagulable model)                                                                         |                                   | In in vivo trials, the doses of PNS (100 and 200 mg/kg) significantly reversed the hypercoagulability state induced in                                                                                                                                                                                                     | In vivo assay: 10, 100 and 200 mg/kg                                                                                                                                          |                                                                                                                          |       |
| notoginsenoside R1<br>[Steroidal saponin]                                               |                                |                                                                                                                                                         |                                   |                                                                                                                                                                                                                                                                                                                            |                                                                                                                                                                               |                                                                                                                          |       |

|                                                            |                          |                                                                                                    |                 |                                                                                                                                                                                                                |                                                                                                                                                                      |                                                 |
|------------------------------------------------------------|--------------------------|----------------------------------------------------------------------------------------------------|-----------------|----------------------------------------------------------------------------------------------------------------------------------------------------------------------------------------------------------------|----------------------------------------------------------------------------------------------------------------------------------------------------------------------|-------------------------------------------------|
|                                                            |                          |                                                                                                    |                 | rats, by prolonging the APTT and PT parameters (values similar to normal control) and decreasing the expression of fibrinogen.                                                                                 |                                                                                                                                                                      |                                                 |
| PNS from Xuesaitong Oral Tablets (Chinese Patent Medicine) | <i>Panax notoginseng</i> | Clinical trial (prospective cohort study, 281 surgical inpatients at moderate to high risk of DVT) | Anti-thrombotic | Significant decrease in the incidence of DVT in the group of exposure patients (PNS+LMWH) with 21 (15.7%) incidents of DVT, compared to the group of control patients (LMWH) with 41 (27.9%) incidents of DVT. | Control group: hypodermic injection of LMWH (4000–8000 AxaIU, once daily)<br><br>Exposure group: Xuesaitong oral tablets (100 mg), 3 times daily, combined with LMWH | [113]<br><br>Inhibition of platelet aggregation |
| notoginsenoside R1 [Steroidal saponin]                     |                          |                                                                                                    |                 |                                                                                                                                                                                                                |                                                                                                                                                                      |                                                 |
| ginsenoside Rg1, ginsenoside Rb1 [Triterpenoid saponins]   |                          |                                                                                                    |                 |                                                                                                                                                                                                                |                                                                                                                                                                      |                                                 |
